# Supplementary material for: An Arabidopsis E3 ligase HUB2 increases histone H2B monoubiquitination and enhances drought tolerance in transgenic cotton
Source: PubMed Central journal article supplement (PMC6381789; doi:10.1111/pbi.12998), 2018-09-04
Supplement: PBI-17-556-s001.pdf [file PBI-17-556-s001.pdf]

1 **Supporting Information**

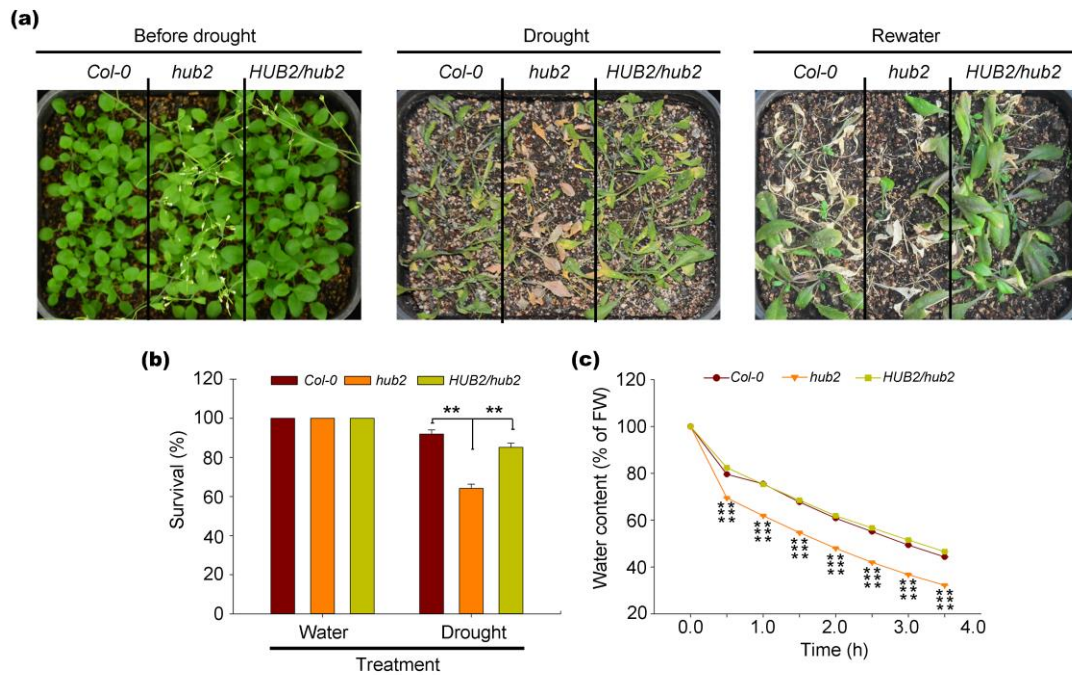

2

3 **Figure S1.** Response of *Athub2* mutants to dehydration stress. (a) Drought  
 4 sensitivity of wild-type (WT), *hub2* mutant and *HUB2/hub2* complementation  
 5 line seedlings. At 2 weeks after germination (Before drought), the plants were  
 6 grown without water (Drought) for 12 days, followed by 3 days of watering for  
 7 recovery (Rewater). (b) Survival percentages of the genotypes indicated in (a)  
 8 after 12 days of drought treatment, followed by the 3-day recovery period. (c)  
 9 The volume of water lost via air-drying from detached leaves of the indicated  
 10 genotypes (4 weeks old) was measured as the percentage of change in the  
 11 fresh weight (FW) of the leaves. Vertical bars represent the SD from three  
 12 independent experiments (n ≥ 30) (\*\*P < 0.01).

13

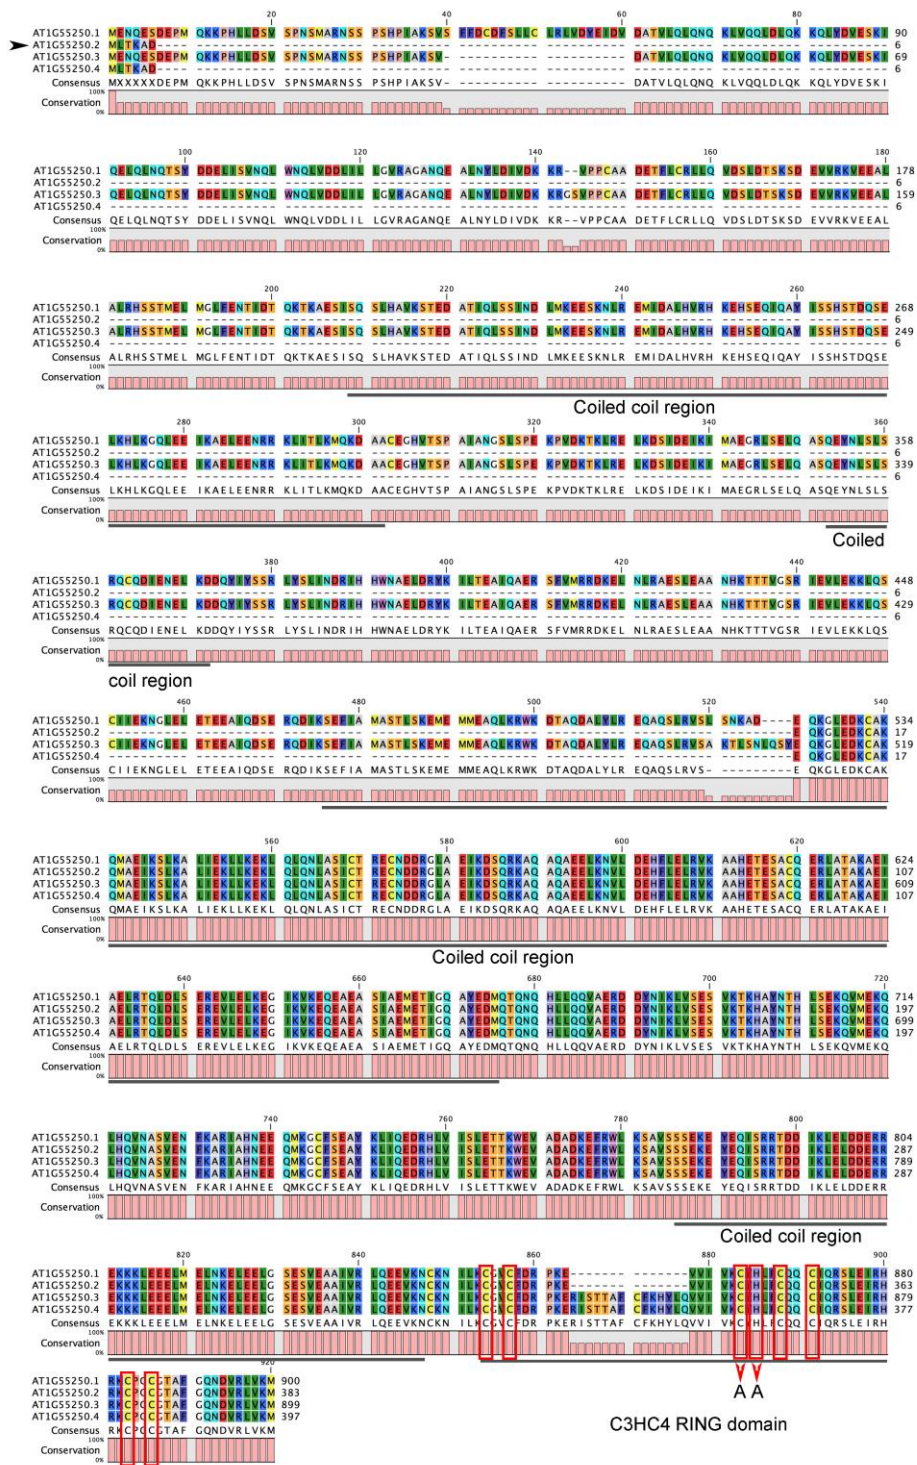

14

15 **Figure S2.** Characteristics of *AtHUB2*. Multiple sequence alignment of the four  
 16 *AtHUB2* alternative splicing isoforms (AT1G55250.1, AT1G55250.2,  
 17 AT1G55250.3, and AT1G55250.4). The black arrow indicates *AtHUB2* cloned  
 18 by our group. The red arrow indicates key functional sites in the conserved  
 19 C3HC4 RING domain.

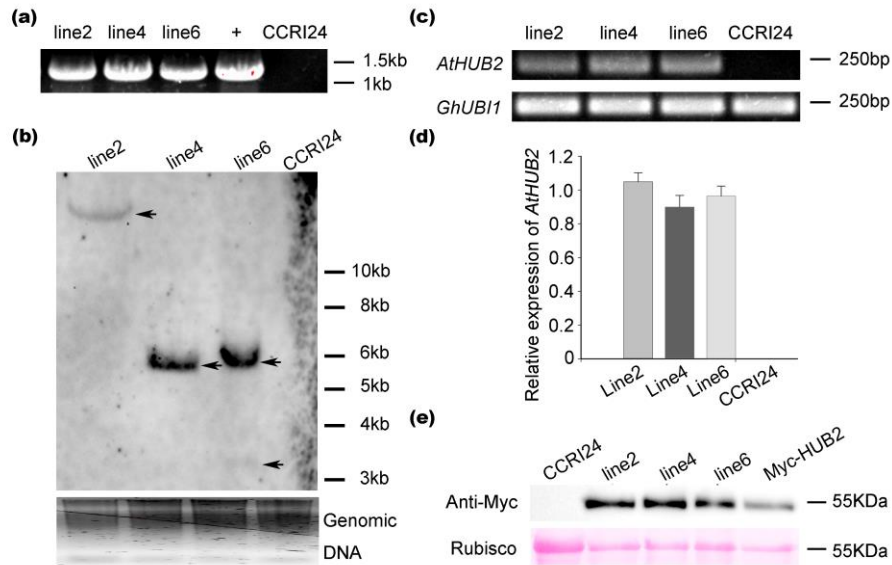

20

21 **Figure S3.** Generation and molecular characterization of transgenic cotton  
 22 lines expressing *AtHUB2*. (a) PCR analysis of *AtHUB2* in the genomic DNA of  
 23 plants from the T2 generation. (b) Southern blotting analysis-positive *AtHUB2*  
 24 transgenic cotton plants; the arrow indicates the target strip. The genomic DNA  
 25 was as loading control. (c) Semi-quantitative RT-PCR analysis of *AtHUB2*  
 26 expression in three T2 transgenic cotton lines. (d) RT-qPCR analysis of *AtHUB2*  
 27 expression in three T2 transgenic cotton lines. (e) Immunoblotting analysis of  
 28 the expression of the *AtHUB2* protein in three T2 transgenic cotton lines. An  
 29 anti-Myc antibody was used to detect the *AtHUB2* protein, Myc-HUB2 was used  
 30 as the positive control, and rubisco protein was as a loading control. The black  
 31 line indicates the strip size.

(a)

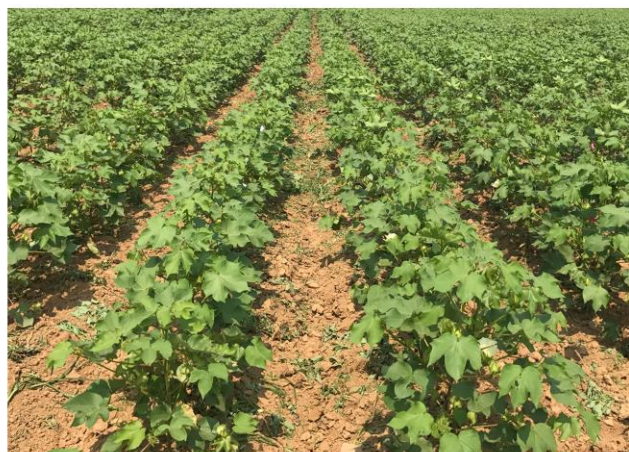

CCRI24

Transgenic line

(b)

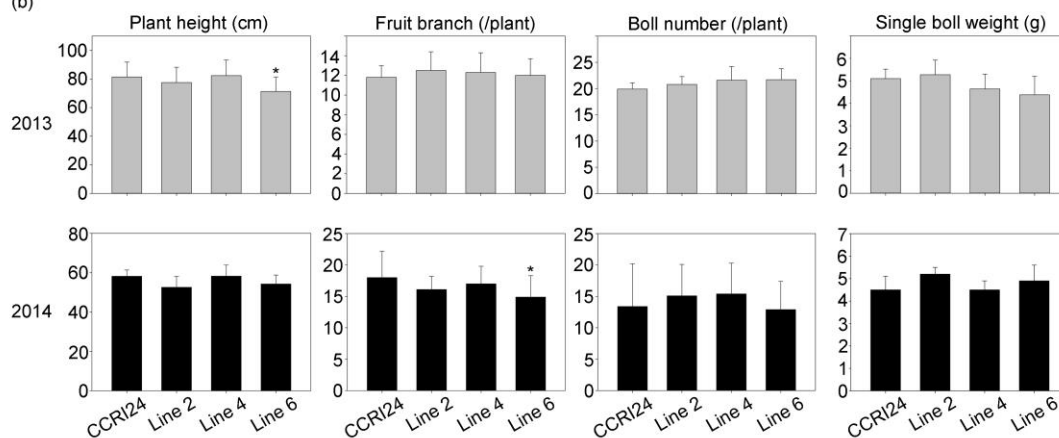

32

33 **Figure S4.** Agronomic traits of different *AtHUB2* transgenic lines in the field. (a)  
34 Wild-type (WT) and *AtHUB2*-expressing cotton lines were grown under normal  
35 conditions. Photographs were taken 90 days after germination. (b) Plant height,  
36 fruit branching, boll number, and single boll weight of the control (CCRI24) and  
37 three independent transgenic lines (line2, line4, and line6) grown in the field (n  
38  $\geq 30$ ). Vertical bars represented the SD. (\* $P < 0.05$ ).

39



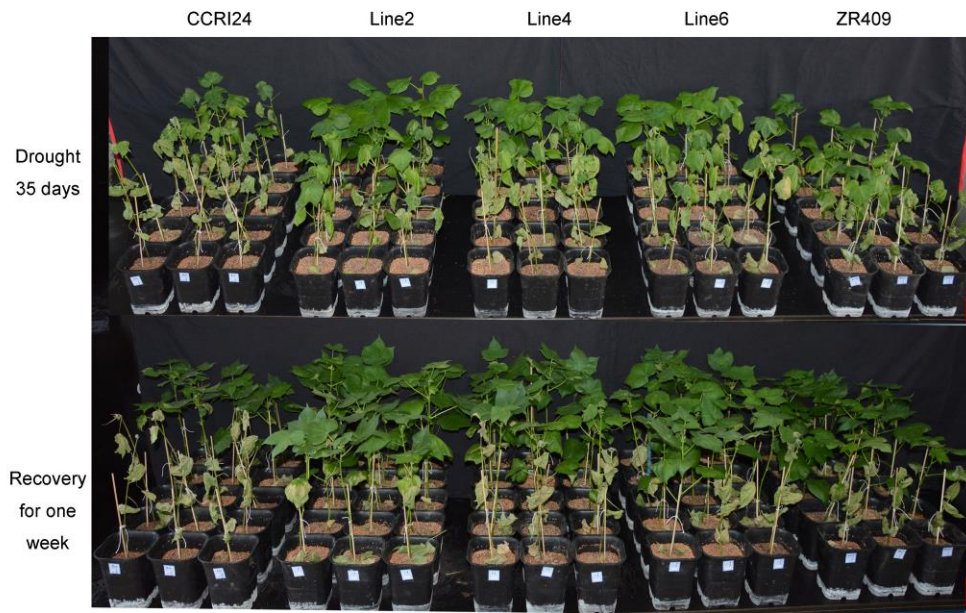

40

41 **Figure S5** *AtHUB2* significantly enhances the drought tolerance of transgenic  
42 cotton in the greenhouse. Drought tolerance of control plants and *AtHUB2*-  
43 expressing cotton plants. Photographs were taken after 35 days of drought  
44 stress and after a 1-week recovery period. Bar = 7.5 cm.

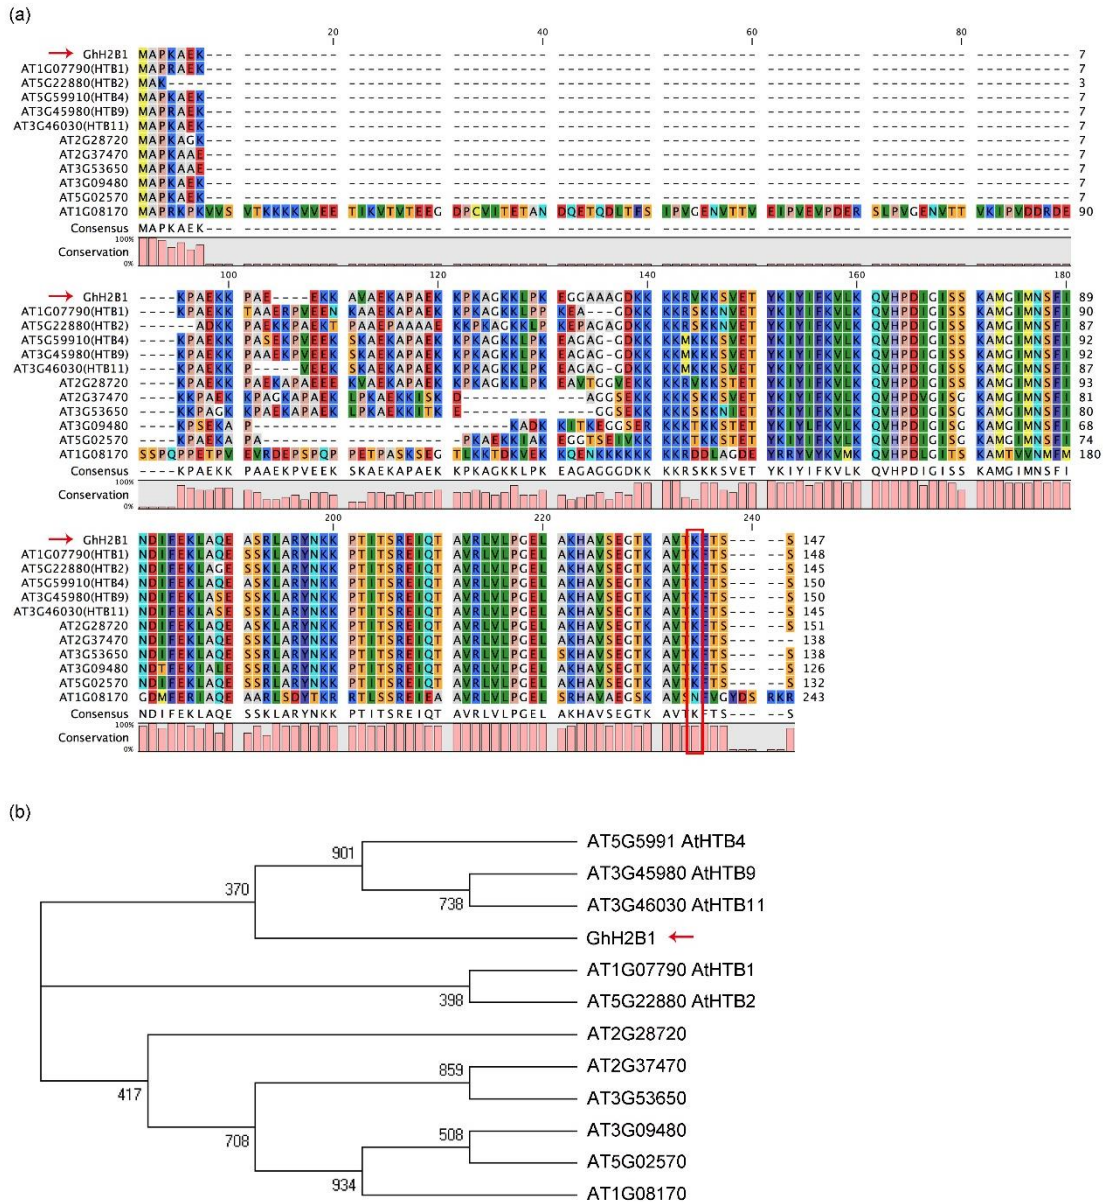

45

46 **Figure S6** Multiple sequence alignment and phylogenetic tree analysis of  
 47 GhH2B1 with *Arabidopsis* histone H2Bs. (a) Multiple sequence alignment was  
 48 performed using CLC Sequence Viewer 7.0, and (b) the phylogenetic tree was  
 49 constructed with the MEGA5 programme using the neighbour-joining method  
 50 with 1,000 bootstraps. The red arrow indicates cotton histone H2B (GhH2B1).

51

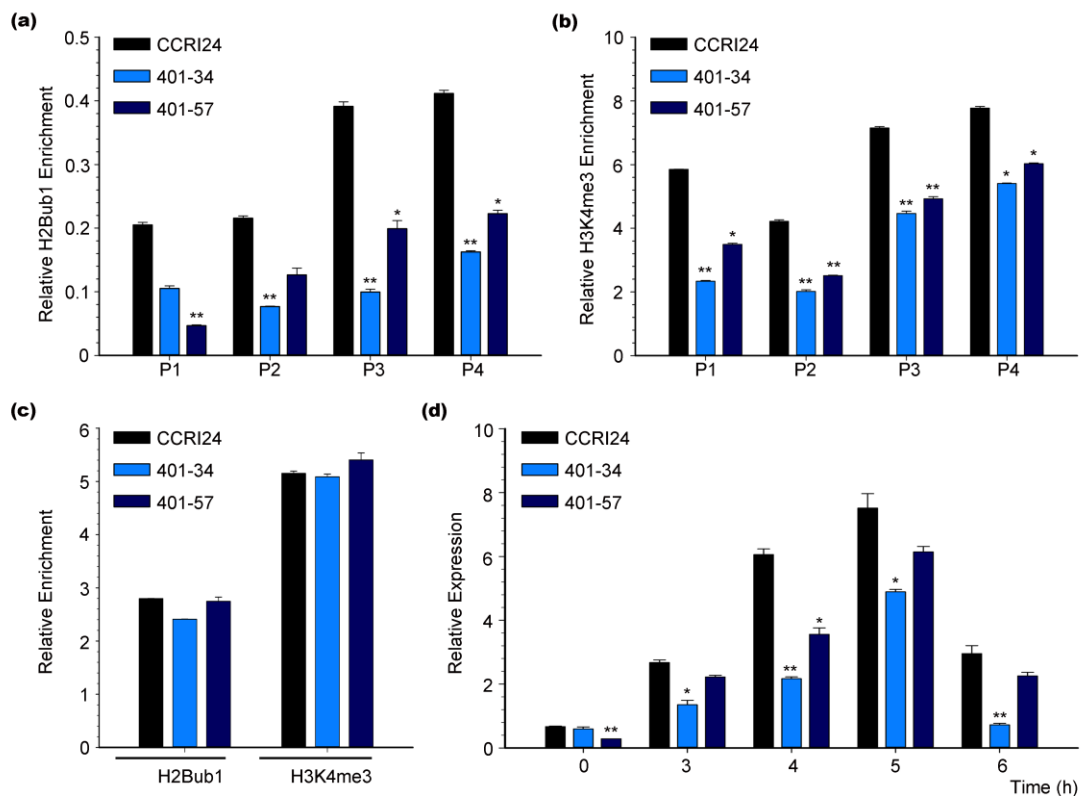

52

53 **Figure S7** Detection *GhDREB* chromatin locus H2Bub1 and H3K4me3 levels  
 54 in *GhHUB2*-knockdown plants. (a) H2Bub1 at the *GhDREB* locus in the CCR124  
 55 and *GhHUB2*-underexpression plants. (b) H3K4me3 at the *GhDREB* locus in  
 56 the CCR124 and transgenic lines. (c) The *GhUBI* gene was selected as a  
 57 housekeeping gene that was not differentially expressed in the transgenic lines.  
 58 (d) Expression of *GhDREB* at different time points of air drought treatment in  
 59 control and *GhHUB2*-knockdown lines. Real-time RT-qPCR quantification was  
 60 normalized to the expression of *GhUBI*. Vertical bars represent SD. (\*P < 0.05,  
 61 \*\*P < 0.01).

62

63

64 **Table S1. The drought related indexes between transgenic cotton lines**  
 65 **and controls.**

| NO.    | wilting | chlorosis | lodging |
|--------|---------|-----------|---------|
| CCRI24 | 2       | 1         | 1       |
| Line 2 | 1       | 0         | 0       |
| Line 4 | 1       | 1         | 0       |
| Line 6 | 1       | 1         | 0       |
| ZR409  | 1       | 0         | 0       |

66 Wilting 1: part of the leaves mild wilting; 2: all of leaves mild wilting; 3: part of leaves mild wilting part

67 severe wilting; 4 most of leaves severe wilting; 5 all of leaves severe wilting

68 Chlorosis 1: part of the leaves mild chlorosis; 2:1/3 leaves chlorosis; 3: part of leaves yellow; 4: part of

69 leaves fall off; 5: leaves withered

70 Lodging 1: angle of inclination < 30°; 2: part angle of inclination >45°; 3: almost angle of inclination >45°;

71 4: part lodging; 5: all lodging

72

73

74

75

76



77 **Table S2. Positive Clones from Library Screening.**

78

| NO. | Blast description                                                      | Accession      | Repeats |
|-----|------------------------------------------------------------------------|----------------|---------|
| 1   | Histone H2B1 [Gossypium hirsutum]                                      | AAB97163.1     | 1       |
| 2   | SINAH1 protein [Gossypium hirsutum]                                    | AAD53877.1     | 2       |
| 3   | RING/U-box superfamily protein isoform 1 [Theobroma cacao]             | XP_007029018.1 | 3       |
| 4   | Xyloglucan endotransglucosylase/hydrolase 2 [Theobroma cacao]          | XP_007049742.1 | 3       |
| 5   | Uncharacterized protein TCM_014645 [Theobroma cacao]                   | XP_007037985.1 | 2       |
| 6   | hypothetical protein JCGZ_11289 [Jatropha curcas]                      | KDP30913.1     | 2       |
| 7   | Histone ubiquitination proteins group [Theobroma cacao]                | XP_007052228.1 | 4       |
| 8   | Zinc transporter 11 precursor isoform 1 [Theobroma cacao]              | XP_007020535.1 | 1       |
| 9   | hypothetical protein CISIN_1g009353mg [Citrus sinensis]                | KDO77403.1     | 1       |
| 10  | PREDICTED: ubiquitin-60S ribosomal protein L40-like [Nelumbo nucifera] | XP_010271616.1 | 1       |
| 11  | GIA/RGA-like gibberellin response modulator [Gossypium hirsutum]       | AAY28970.1     | 1       |
| 12  | putative adenine nucleotide translocase [Castanea sativa]              | AAL15894.1     | 1       |
| 13  | Cell division protein ftsH [Populus trichocarpa]                       | XP_002301927.1 | 1       |
| 14  | heat shock protein 70 [Gossypium hirsutum]                             | ACJ11745.1     | 1       |
| 15  | uncharacterized protein LOC100306699 [Glycine max]                     | NP_001235125.1 | 1       |
| 16  | chloroplast chlorophyll A-B binding protein [Gossypium hirsutum]       | ACO51067.1     | 1       |
| 17  | Chromatin remodeling 24 [Theobroma cacao]                              | XP_007048407.1 | 1       |

79

80 **Supplemental Table 3. Primers used in this study.**

81

82 **For cloning**

| Name                   |         | Primer sequences (5'--3')                           |
|------------------------|---------|-----------------------------------------------------|
| GFP-HUB2               | Forward | ATGGATCCATGCTAACAAAGGCAG                            |
|                        | Reverse | CGGTCGACTTACATTTTGACAAGC                            |
| LUC <sup>c</sup> -HUB2 | Forward | CCGGGGATCCGATGCTAACAAAGGCAGACGAACAG                 |
|                        | Reverse | AATTGTCGACTTACATTTTGACAAGCCGGACG                    |
| HUB2-GST               | Forward | CGCGGATCCATGCTAACAAAGGCAGACGAACAG                   |
|                        | Reverse | CCCTCGAGTTACATTTTGACAAGCCGGACGTC                    |
| HUB2-BD                | Forward | CGCCATATGCTAACAA AGGCAGACGA                         |
|                        | Reverse | CGCGGATCCTTACATTTTGACAAGCCGGACG                     |
| HUB2(1-160)-BD         | Forward | CGCCATATGCTAACAA AGGCAGACGA                         |
|                        | Reverse | CGCGGATCCCAACAAATGT TGGTTCTGTG                      |
| HUB2(1-260)-BD         | Forward | CGCCATATGCTAACAA AGGCAGACGA                         |
|                        | Reverse | CGCGGATCCGGCCGACTTG AGCCATCTGA                      |
| HUB2(160-330)-BD       | Forward | CGCCATATGCAGCAGGTGG CTGAGCGGGA                      |
|                        | Reverse | CGCGGATCCTTTGAGGATGTTTTTGCAATTC                     |
| HUB2(260-330)-BD       | Forward | CGCCATATGGTGTCTTCAT CCGAAAAGGA                      |
|                        | Reverse | CGCGGATCCTTTGAGGATGTTTTTGCAATTC                     |
| HUB2(330-383)-BD       | Forward | CGCCATATG TGTGGTGTAT GTTTTGATCG                     |
|                        | Reverse | CGCGGATCCTTACATTTTGACAAGCCGGACG                     |
| HUB2-pENTR2b           | Forward | AGGATCCGATGCTAACAAAGGCAG                            |
|                        | Reverse | ACCTCGAGTTACATTTTGACAAGC                            |
| HUB2-pDEST32           | Forward | GGGGACAAGTTTGTACAAAAAAGCAGGCTTGATGCTA<br>ACAAAGGCAG |
|                        | Reverse | GGGGACCACTTTGTACAAGAAAGCTGGGTTTACATTT<br>TGACAAGC   |
| HUB2 mutant            | Forward | GTGGTAATTGTGAAAGCTTATGCCCTG                         |

|                         |         |                                                                                |
|-------------------------|---------|--------------------------------------------------------------------------------|
|                         | Reverse | CTGGCAGAACAGGGCATAAGCTTT                                                       |
| pC1305.1-HUB2           | Forward | <u>ATCCATGGTAGAACAGAAGTTGATTTCCGAAGAAGAC</u><br><u>CTCATGCTAACA AAGGCAGACG</u> |
|                         | Reverse | <u>AAACTAGTGTTACATTTTGACAAGCCGGAC</u>                                          |
| CaMV 35S promoter       | Forward | GCTCCTACAAATGCCATCA                                                            |
| HUB2                    | Reverse | GTTACATTTTGACAAGCCGGAC                                                         |
| GFP-GhH2B1              | Forward | <u>GGATCCATGGCACCAAAGCTGAAAA</u>                                               |
|                         | Reverse | <u>GTCGACTCAAGATGAA GTAAACTTGG</u>                                             |
| GhH2B1-LUC <sup>n</sup> | Forward | AATT <u>GAGCTCATGGCACCAAAGCTGAAAAAA</u>                                        |
|                         | Reverse | TTAAG <u>TCGACAAAAGATGAAGTAACTTGGTCAC</u>                                      |
| GhH2B1-His              | Forward | CGC <u>GGATCCATGGCACCAAAGCTGAAAA</u> AAA                                       |
|                         | Reverse | CCCTCGAGAAAAGATGAAGTAACTTGGTCAC                                                |
| GhH2B1-AD               | Forward | CCGGAATTCATGGCACCAA AAGCTGAAAA AAA                                             |
|                         | Reverse | CGC <u>GGATCCTCAAGATGAAGTAACTTGGTCAC</u>                                       |
| GFP-AtH2B               | Forward | <u>GGATCCATGGCGCCGA GAGCAGAGAA</u>                                             |
|                         | Reverse | <u>GTCGACTCAAGAGCTT GTGAATTTGG</u>                                             |
| AtH2B-LUC <sup>n</sup>  | Forward | CCGGG <u>GATCCGATGGCGCCGAGAGCAGAGAAGAAG</u>                                    |
|                         | Reverse | TTAAG <u>TCGACTTTAGAGCTTGTGAATTTGGTAA</u>                                      |
| AtH2B-His               | Forward | CGC <u>GGATCCATGGCGCCGAGAGCAGAGAA</u> GAAG                                     |
|                         | Reverse | CCCTCGAGTTTAGAGCTTGTGAATTTGGTAA                                                |
| AtH2B-AD                | Forward | CCGGAATTCATGGCGCCGAGAGCAGAGAA GAAG                                             |
|                         | Reverse | CGC <u>GGATCCTCAAGAGCTTGTGAATTTGGTAA</u>                                       |
| AtHUB2 southern blot    | Forward | CCGAAGAAGACCTCATGCTAACAAAGGCAGAC                                               |
|                         | Reverse | GATGAAGACACGGCCGACTTGAGCCATC                                                   |

83

84 **For real-time PCR**

|        |         |                        |
|--------|---------|------------------------|
| AtHUB2 | Forward | GAAGCTGCAATTGTGAGGCTC  |
|        | Reverse | ATTTCCGGTGTTCGGATCTCT  |
| GhUBI1 | Forward | CTGAATCTTCGCTTTCACGTTA |

|                |         |                             |
|----------------|---------|-----------------------------|
|                | Reverse | GGGATGCAAATCTTCGTGAAA       |
| GhP5CS         | Forward | AGATGGATTCTGAAAGGAAG        |
|                | Reverse | CCTTTGACGACCAAGACCA         |
| GhPP2C         | Forward | ACGCGGTTCAAAACTCAAAA        |
|                | Reverse | TCCATATCTCGTCTCCTTCCA       |
| GhRD22         | Forward | AACAAACCCCAATGCAAAAG        |
|                | Reverse | AGCACCCCTCTAAAGGAACCA       |
| GhDREB         | Forward | GTTGATTTCTGGGTCGGTTT        |
|                | Reverse | AAGCCAAATCCTCGACTTCTT       |
| GhPIP2;7       | Forward | TACTGCACTGCCGGTATCTC        |
|                | Reverse | CAAGGCAGTTCCTTGTTGT         |
| GhMKK2         | Forward | TTGGTGTGAGTCGGATCTTG        |
|                | Reverse | GGCCCAATCACCTTGTCTT         |
| XP_016725369.1 | Forward | CGGAGGATGGTTTTATTGCT        |
|                | Reverse | ACCCCTTTTTGGAACCTTTG        |
| XP_016729746.1 | Forward | TCTACTACGGCTACGGCAAG        |
|                | Reverse | CCTCGTTAAAAGCCATCCA         |
| XP_016722486.1 | Forward | TCGTCTTTGTTTCCGGTTTC        |
|                | Reverse | TACCCTTCATGCACCCTTTC        |
| XP_016700483.1 | Forward | CAAGAAAGGGTGCATGAAGG        |
|                | Reverse | GTCACCGTACATGGCTTTGG        |
| GhDREB P1      | Forward | GTCCAAGCAAGAAATTAGGTCTGTATG |
|                | Reverse | GAGCTTCAAATAAAACACACACGCC   |
| GhDREB P2      | Forward | CAGCCAAGTGGGTAATAACTG       |
|                | Reverse | GTTTCTGGAACTATAACTTGTAAGCC  |
| GhDREB P3      | Forward | CATTCCACTACCAAAAAGGAAGCCC   |
|                | Reverse | GGTGGCTAGTTGGCAAGTCAAG      |
| GhDREB P4      | Forward | CGGAGAGAAGCGAAAGCTGCA       |
|                | Reverse | GTAGAAAACGGCTGTGTCATAAGC    |
